# Supplementary material
Source: PubMed Central journal article supplement (PMC4303450)

## Supplementary Figure 1

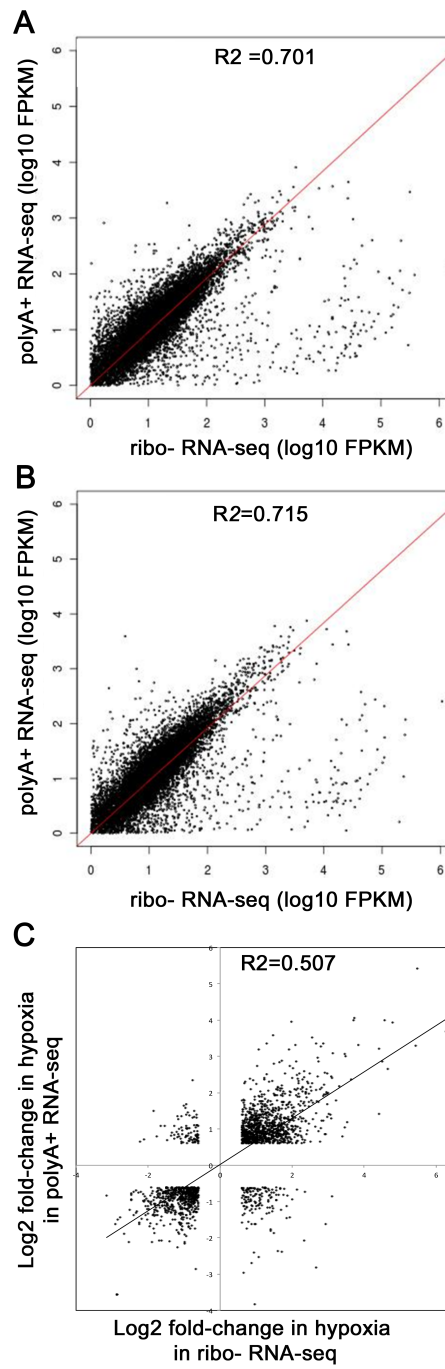

Supplement: embr0015-0070-sd1.pdf [file embr0015-0070-sd1.pdf]
