# Supplementary material
Source: PubMed Central journal article supplement (PMC4303450)

Supplementary Figure 8

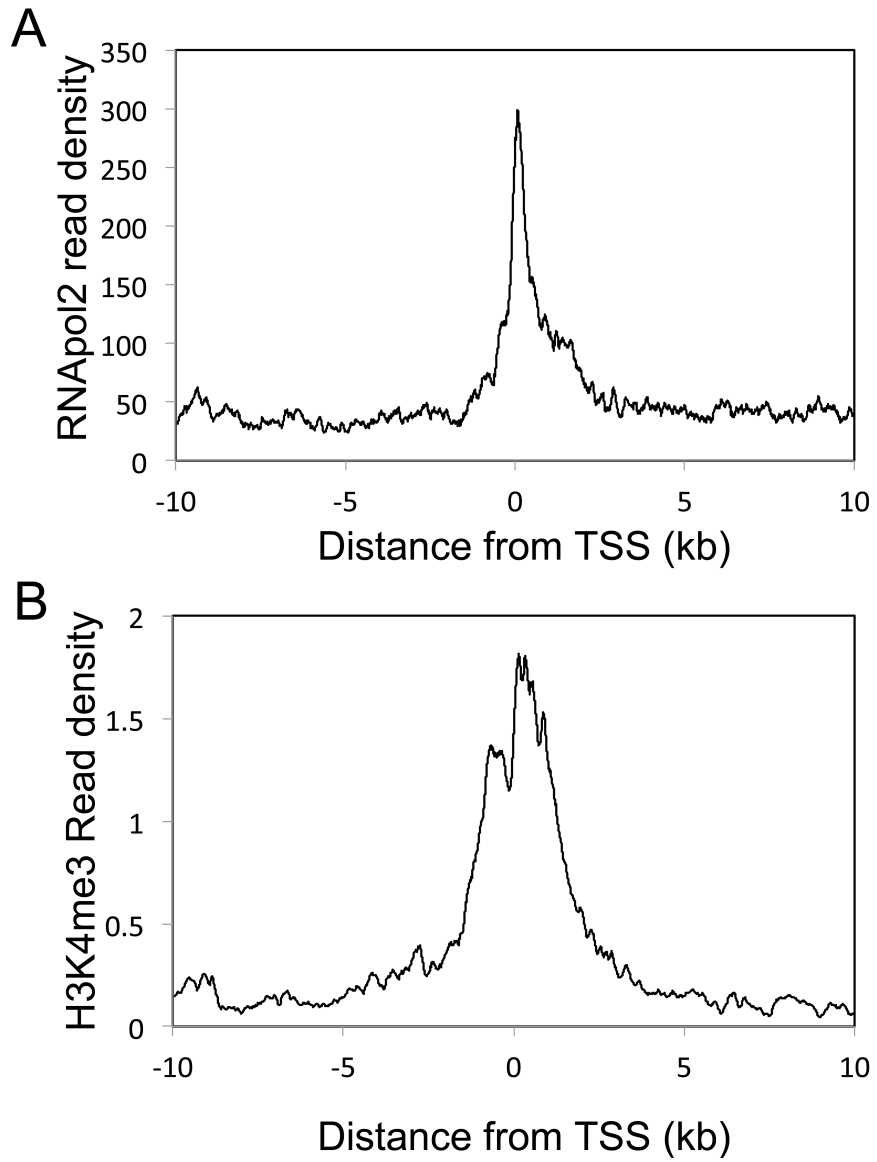

Supplement: embr0015-0070-sd8.pdf [file embr0015-0070-sd8.pdf]
