# Supplementary material
Source: PubMed Central journal article supplement (PMC4303450)

## Supplementary Figure 9

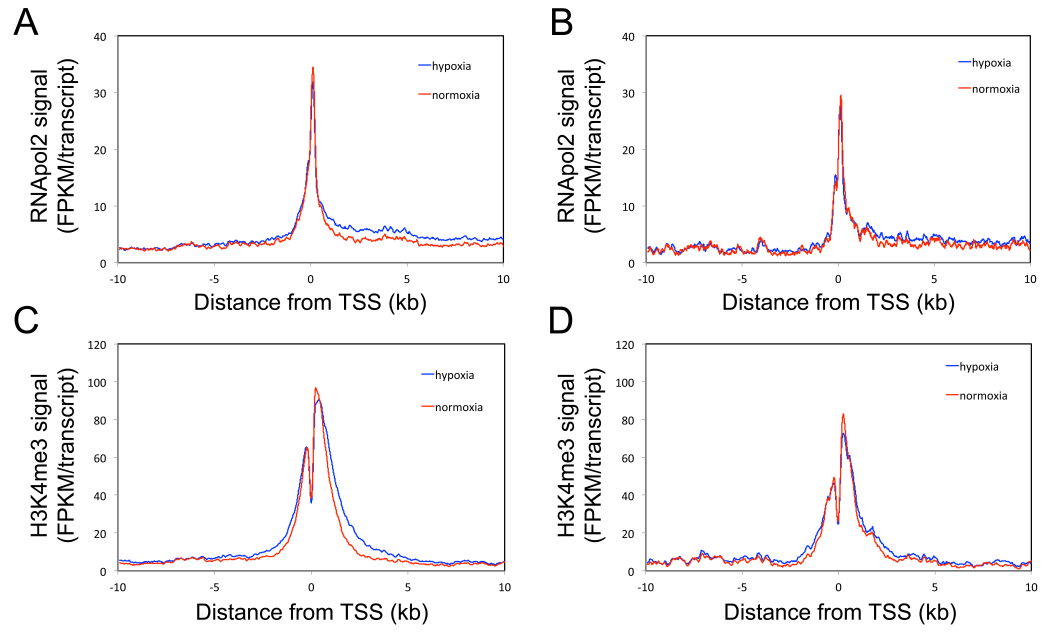

Supplement: embr0015-0070-sd9.pdf [file embr0015-0070-sd9.pdf]
