# Supplementary material
Source: PubMed Central journal article supplement (PMC4303450)
Supplement: embr0015-0070-sd14.pdf [file embr0015-0070-sd14.pdf]

**Supplementary Table 4.** Non-annotated anti-sense transcripts (NATs)

| Name              | Chr   | Start     | End       | Strand | Fold regulation | Overlapping region of original gene | Regulation of sense gene |
|-------------------|-------|-----------|-----------|--------|-----------------|-------------------------------------|--------------------------|
| aARMC5            | chr16 | 31461767  | 31470706  | -      | 1.6             | 5'                                  | Up                       |
| aATF7IP2          | chr16 | 10527741  | 10712970  | -      | 1.5             | 3'                                  | Up                       |
| aMAMDC4/<br>PHPT1 | chr9  | 139738901 | 139759957 | -      | 1.3             | Cover                               | Up                       |
| aTSEN54           | chr17 | 73517363  | 73521618  | -      | 1.3             | 3'                                  | Down                     |
| aTPBG             | chr6  | 83072075  | 83075226  | -      | 1.3             | 5'                                  | Up                       |
| aTBX2             | chr17 | 59470718  | 59477783  | -      | 1.5             | 5'                                  | Down                     |
| aSTXBP2           | chr19 | 7697325   | 7702009   | -      | 1.6             | 5'                                  | Up                       |
| aSPAG4            | chr20 | 34196650  | 34207240  | -      | 1.4             | 5'                                  | Up                       |
| aCHRAC1           | chr8  | 141516112 | 141521724 | -      | 1.5             | 5'                                  | Down                     |
| aGRIN1            | chr9  | 140056711 | 140062733 | -      | 1.5             | 3'                                  | Not expressed            |
| aHIF1A            | chr14 | 62175449  | 62214842  | -      | 1.3             | 3'                                  | Down                     |
| aLENG8            | chr19 | 54959291  | 54960259  | -      | 1.3             | 5'                                  | Up                       |
| aLOC338758        | chr12 | 90056440  | 90103653  | -      | 1.4             | 5'                                  | Up                       |
| aSPTSSB           | chr3  | 161089733 | 161146159 | +      | 1.2             | 5'                                  | Up                       |
| aBRAT1            | chr7  | 2577658   | 2587164   | +      | 1.1             | 3'                                  | Down                     |
| aZIC4             | chr3  | 147111164 | 147128972 | +      | 1.6             | 5'                                  | Non regulated            |
| aTUT1             | chr11 | 62341769  | 62346553  | +      | 1.3             | Middle                              | Non regulated            |
| aTRIM17           | chr1  | 228594940 | 228602400 | +      | 1.3             | 3'                                  | Down                     |
| aTHEM5            | chr1  | 151812700 | 151825963 | +      | 1.3             | 3'                                  | Not expressed            |
| aTBC1D10B         | chr16 | 30366581  | 30370364  | +      | 1.5             | 3'                                  | Up                       |
| aSRMS             | chr20 | 62170196  | 62175250  | +      | 1.3             | 3'                                  | Up                       |
| aSLC39A4          | chr8  | 145638718 | 145644681 | +      | 1.5             | 5'                                  | Non regulated            |
| aRASEF            | chr9  | 85677150  | 85684988  | +      | 1.1             | 5'                                  | Up                       |
| aPTRN             | chr2  | 220163641 | 220168902 | +      | 1.3             | 3'                                  | Not expressed            |
| aPRICKLE2         | chr3  | 64021527  | 64102071  | +      | 1.1             | 5'                                  | Up                       |
| aCPLX1            | chr4  | 776511    | 783395    | +      | 1.4             | 3'                                  | Non regulated            |
| aGMEB2            | chr20 | 62258636  | 62259915  | +      | 1.3             | 5'                                  | Up                       |
| aGPR132           | chr14 | 105499226 | 105522613 | +      | 1.5             | 3'                                  | Up                       |
| aHDLBP            | chr2  | 242157867 | 242184464 | +      | 1.8             | 3'                                  | Not expressed            |
| aKPNA1            | chr3  | 122135105 | 122146064 | +      | 1.5             | 3'                                  | Down                     |
| aLCAT             | chr16 | 67969845  | 67982503  | +      | 1.4             | Cover                               | Non regulated            |
| aBCAS3            | chr17 | 59432883  | 59480160  | -      | 1.5             | 3'                                  | Down                     |
| aCELSR2           | chr1  | 109788560 | 109796206 | -      | 1.5             | 5'                                  | UP                       |
| aBCAN             | chr1  | 156607605 | 156616958 | -      | 1.4             | 5'                                  | Up regulated             |
| aADRM1            | chr20 | 60880596  | 60884025  | -      | 1.1             | Middle                              | Down                     |
| aAPC2             | chr19 | 1457662   | 1461617   | -      | 1.1             | Middle                              | not expressed            |
| aPCIF1            | chr20 | 44562017  | 44563625  | -      | 1.4             | 5'                                  | Up                       |
