# Supplementary material
Source: PubMed Central journal article supplement (PMC4303450)
Supplement: embr0015-0070-sd15.pdf [file embr0015-0070-sd15.pdf]

**Supplementary Table 5.** Oligonucleotides for qPCR

| ID                       | Forward Primer 5'-3'  | Reverse Primer 5'-3'  |
|--------------------------|-----------------------|-----------------------|
| NEAT1                    | CCAGTTTTCCGAGAACCAAA  | ATGCTGATCTGCTGCGTATG  |
| MALAT1                   | GGAAAGCGAGTGGTTGGTAA  | TCTCCAGGACTTGGCAGTCT  |
| aSPAG4                   | CCTCCAAAGAGCTGTTCTCTG | CTAGCCGACCCTCTCTTCTCT |
| aSLC25A24                | GTGTCTGCCAGCTGCACTTA  | GACTACCCGGAGACGCTATG  |
| aGMEB2                   | GACGCTGCTGTGTGTGAATG  | GCCCTCCTCTACAAGTGTG   |
| aTMEM167B                | AGAAGCCGTAGTACGCAGGA  | AGTTACCACGGCCAAGTACG  |
| aTRIM52                  | CTAAAGCTGAAGGGCAGGTG  | TTTCAAACTGTGGGTGTGC   |
| aCCDC170                 | TAGTCTTGCCTTCTCTGACA  | CAGCTGTTACCGTGTAGGTCA |
| aGPR132                  | GACCTGGGAGAACAGTTCCA  | TCCAGCCTCTAGCCACAGTT  |
| aABHD16B                 | CGGGGACTAGGGACATGTAG  | CCTAGCTCTGTCCCCTCCTT  |
| aMIPEP                   | GGTTGAGAGTCTGTGTCTC   | AGCCTTTGCTCTGAGTTCCA  |
| aTHEM5                   | GTTGCCAAGCATGTGACTGT  | TTGGATCCTCCACAGACTCC  |
| chr16:85587072-85589839  | GGTCGGAGAGAGAGCCTTTT  | TTCCATAGTGGCCAGAGAGG  |
| chr11:70995192-70998931  | TGCTGTGCACTTGTGTGTTT  | CCCCTGCAGTCACCTTTTAT  |
| chr7:129244613-129251530 | TGAAGGAGTAGGAGGGCAAA  | AAACACGTGGCTTTCCTGTT  |
| chr20:292339-305552      | GACCAGCATCTCAACTGCAA  | TCTTCCCCTCCTTCCAAT    |
| chr5:172721232-172730376 | CGCAACTGTAGCACATGGAT  | TGCCTTCGCAAGAGTCTTCT  |
| chr5:177485281-177505466 | GTAGGGCCTGTGCCTTTTCT  | TGGTTGAGACGTCTGTGAGC  |
| chr12:8116260-8123253    | AAAAAGGAGAGCGGTAAGT   | GCCCGAACTACAATTCTTGG  |
| chr16:85479122-85498916  | ACCACCTAAGCCGACATCTG  | CTCTGTGTGCACCTCTCTGC  |
| ALDOA gene body          | GCTATGGCCTTTTCTTTCC   | AACTCTGTCTGGTGCTGGGT  |
| NDRG1 gene body          | GAAGTCACAGGTCAGGGGAA  | AGGGAGAGAGAGGGTTTTGG  |
